# Supplementary material
Source: MDPI journal article supplement (https://www.mdpi.com/2072-4292/10/1/44)
Supplement: s1 [file s1]

**Tables**

Table S1 Landsat mission

| Mission | Instruments | Repeat cycle | Band number | Equatorial crossing time | Launch | End of imaging |
| --- | --- | --- | --- | --- | --- | --- |
| Landsat 1 | MSS1, RBV2 | 18 days | 4 | 9:30 a.m.±15 min | July 23,1972 | January 6, 1978 |
| Landsat 2 | MSS, RBV | 18 days | 4 | 9:30 a.m.±15 min | January 22, 1975 | February 25, 1982 |
| Landsat 3 | MSS, RBV | 18 days | 4 | 9:30 a.m.±15 min | March 5, 1978 | March 31, 1983 |
| Landsat 4 | MSS, TM | 16 days | 7 | 9:45 a.m.±15 min | July 16, 1982 | December 14,1993 |
| Landsat 5 | MSS, TM | 16 days | 7 | 9:45 a.m.±15 min | March 1, 1984 | Ongoing |
| Landsat 6 | ETM | 16 days | 8 | 10:00 a.m.±15 min | October 5, 1993 | Failed to reach orbit |
| Landsat 7 | ETM+3 | 16 days | 8 | 10:00 a.m.±15 min | April 15, 1999 | Ongoing |
| LDCM4 (Landsat 8) OLI5 | TIRS6 | 16 days | 11 | 10:00 a.m.±15 min | February 11, 2013 | Ongoing |

Notes: 1. MSS-Multispectral Scanner; 2. RBV – Return Beam Vidicon; 3 scan-line corrector failure on May 31, 2003.4. LDCM-Landsat Data Continuity Mission; 5. OLI- Operational Land Imager; 6. TIR-Thermal Infrared Sensor.

**Supplementary Equations:**

Merging of objects may be significantly affected by the values set for shape and compactness paramenters (Kavzoglu and Yildiz 2014; Lowe and Gao 2011). The variable represents the smoothness and compactness of an object’s shape (Equ.1). This is determined by and , where indicates object size, is the perimeter of the object, is the perimeter of an object’s bounding box on an image object (Equ.2 & Equ.3), is the number of pixels within a merged object, is the number of pixels in object 1, and is the number of pixels in object 2 (Equ.2 & Equ.3). The sum of and is 1. Both and are user-defined weight parameters.

(1)

(2)

(3)

{} (4)

For a shape, the sum of and is 1 (Equ. 5). is a spectral band index; is weight and is the standard deviation of the values of band (Equ.6).

{} (5)

(6)

**Reference**

Kavzoglu, T.; Yildiz, M. Parameter-based performance analysis of object-based image analysis using aerial and Quikbird-2 images. ISPRS J. Photogramm. Remote Sens. 2014, II-7, 31-37, 10.5194/isprsannals-II-7-31-2014.

Lowe, S. H.; Guo, X. Detecting an Optimal Scale Parameter in Object-Oriented Classification. IEEE J Sel Topics Appl Earth Observ 2011, 4, 890–895.
